# Supplementary material
Source: Springer Nature journal article supplement (https://www.springermedizin.de/resource/supplementary/12885_2012_3667_MOESM1_ESM.pdf/9465900)

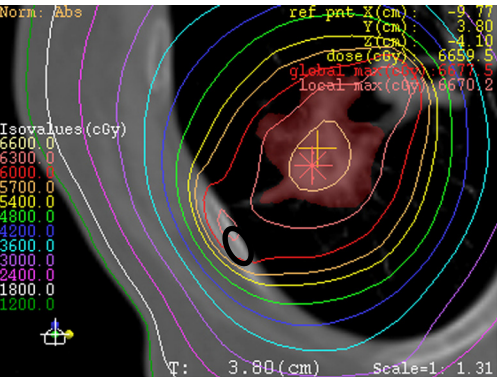

A

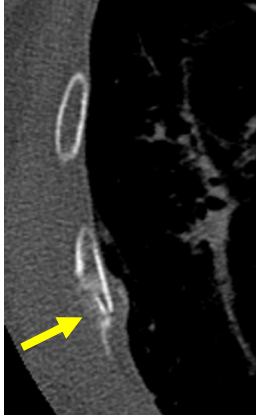

B

Supplement: MOESM1 [file 9465900]
